# Supplementary material for: Association between Lifestyle Behaviours and Mental Health of Adolescents: Evidence from the Canadian HBSC Surveys, 2002–2014
Source: MDPI journal article supplement (doi:10.3390/ijerph19116899), 2022-06-04
Supplement: s1 [file s1]

**Table S1.** Sensitivity analysis of associations between physical activity, screen time, and frequent psychosomatic complaints in Canadian adolescents, HBSC 2002-2014.

| Characteristics                         | Overall              | Boys                 | Girls                |
|-----------------------------------------|----------------------|----------------------|----------------------|
|                                         | Adjusted OR (95% CI) | Adjusted OR (95% CI) | Adjusted OR (95% CI) |
| Physical activity ( $\geq 60$ mins/day) |                      |                      |                      |
| $\leq 2$ days                           | 1 [Reference]        | 1 [Reference]        | 1 [Reference]        |
| 3-4 days                                | 0.69 (0.62-0.75)     | 0.69 (0.59-0.80)     | 0.69 (0.61-0.78)     |
| 5-6 days                                | 0.59 (0.54-0.65)     | 0.56 (0.48-0.66)     | 0.62 (0.55-0.70)     |
| 7 days                                  | 0.68 (0.61-0.75)     | 0.62 (0.53-0.72)     | 0.75 (0.65-0.87)     |
| Daily screen time                       |                      |                      |                      |
| $\leq 4$ hrs/d                          | 1 [Reference]        | 1 [Reference]        | 1 [Reference]        |
| 4-6 hrs/d                               | 1.20 (1.09-1.31)     | 1.12 (0.97-1.30)     | 1.24 (1.10-1.40)     |
| 6-9 hrs/d                               | 1.48 (1.35-1.62)     | 1.40 (1.21-1.61)     | 1.52 (1.35-1.71)     |
| $> 9$ hrs/d                             | 1.97 (1.80-2.15)     | 1.75 (1.53-2.00)     | 2.15 (1.92-2.42)     |

OR Odds ratio

CI Confidence interval

Models were adjusted for age, body mass index, alcohol consumption, family affluence scale (FAS) score, and survey cycle; the model based on the overall sample is additionally adjusted for gender.
